# Supplementary material for: Investigation of the Association between the Energy Metabolism of the Insect Vector Laodelphax striatellus and Rice Stripe Virus (RSV)
Source: MDPI journal article supplement (doi:10.3390/v14102298), 2022-10-19
Supplement: s1 [file s1]

# Supplementary Materials:

**Table S1.** Oligonucleotide primers.

| Primer name     | Sequence (5' to 3')                     | Description       |
|-----------------|-----------------------------------------|-------------------|
| 3'-LsATPase     | TACCTGGCTCCCTACTCGGGCTGTG               | LsATPase RACE     |
| 5'-LsATPase     | CAACAGCCTGCTTGGACAAATCG                 |                   |
| 3'-LsMIT13      | GCCAGGTTTCGTCATTAGGAACTCAG              | LsMIT13 RACE      |
| 5'-LsMIT13      | TCCATATAGCGGTCCATGCACATC                |                   |
| 3'-LsNADP-ME    | AACATCAAACCCCATCAGTGCCTACC              | LsNADP-ME RACE    |
| 5'-LsNADP-ME    | GATTGGTAGGCACTGATGGGGTTT                |                   |
| T7-dsLsATPase-F | TAATACGACTCACTATAGGCACTCACCAGCAAGACCAGA | LsATPase dsRNA    |
| T7-dsLsATPase-R | TAATACGACTCACTATAGGGCAGTAGCGCACACAATGAT |                   |
| T7-dsLsMIT13-F  | TAATACGACTCACTATAGGATGGATACTCTCACTTCAGG | LsMIT13 dsRNA     |
| T7-dsLsMIT13-R  | TAATACGACTCACTATAGGCGGTCCATGCACATCGCAAT |                   |
| T7-dsLsNADP-F   | TAATACGACTCACTATAGGCTTCTACCGTCGCAAACAG  | LsNADP-ME dsRNA   |
| T7-dsLsNADP-R   | TAATACGACTCACTATAGGGATACGCTCACCGTCAGTC  |                   |
| LsATPase-qF     | TGGTGGAGTTCTCGTCTGGC                    | LsATPase qRT-PCR  |
| LsATPase-qR     | TGTCGCCCTCCTTGATGTGC                    |                   |
| LsMIT13-qF      | CGTGAACGGCATCGTATGTA                    | LsMIT13 qRT-PCR   |
| LsMIT13-qR      | ACCATCTTTTATGCCGTTACTCAC                |                   |
| LsNADP-ME-qF    | GCCAGTGGATCACCGTTTGA                    | LsNADP-ME qRT-PCR |
| LsNADP-ME-qR    | GCGGCAGTTAGGAAAACGTC                    |                   |
